# Supplementary material for: Impact of Pre-Blood Collection Factors on Plasma Metabolomic Profiles
Source: PubMed Central journal article supplement (PMC7281389; doi:10.3390/metabo10050213), 2020-05-21
Supplement: metabolites-10-00213-s001.pdf [file metabolites-10-00213-s001.pdf]

*Supplementary tables for*

# **Impact of pre-blood collection factors on plasma metabolomic profiles**

**Sheetal Hardikar<sup>1,2,3\*</sup>, Richard D. Albrechtsen<sup>1</sup>, David Achaintre<sup>4</sup>, Tengda Lin<sup>1,2</sup>, Svenja Pauleck<sup>1</sup>, Mary Playdon<sup>1,5</sup>, Andreana N. Holowatyj<sup>1,2,6,7</sup>, Biljana Gigic<sup>8</sup>, Petra Schrotz-King<sup>9</sup>, Juergen Boehm<sup>1</sup>, Stefanie Brezina<sup>10</sup>, Andrea Gsur<sup>10</sup>, Eline H. van Roekel<sup>11</sup>, Matty P. Weijnen<sup>11</sup>, Pekka Keski-Rahkonen<sup>4</sup>, Augustin Scalbert<sup>4</sup>, Jennifer Ose<sup>1,2&</sup>, Cornelia M. Ulrich<sup>1,2&</sup>**

<sup>1</sup>Population Sciences, Huntsman Cancer Institute, Salt Lake City, Utah

<sup>2</sup>Department of Population Health Sciences, University of Utah, Salt Lake City, Utah

<sup>3</sup>Cancer Prevention, Population Health Sciences, Fred Hutchinson Cancer Research Institute, Seattle, Washington

<sup>4</sup>International Agency for Research on Cancer, Lyon, France

<sup>5</sup>Department of Nutrition and Integrative Physiology, University of Utah, Salt Lake City, Utah

<sup>6</sup>Department of Medicine, Vanderbilt University Medical Center, Nashville, Tennessee

<sup>7</sup>Vanderbilt-Ingram Cancer Center, Nashville, Tennessee

<sup>8</sup>Department of Surgery, University of Heidelberg, Germany

<sup>9</sup>Division of Preventive Oncology, National Center for Tumor Diseases (NCT) and German Cancer Research Center (DKFZ), Heidelberg, Germany

<sup>10</sup>Institute of Cancer Research, Department of Medicine, Medical University of Vienna, Austria.

<sup>11</sup>Department of Epidemiology, GROW School for Oncology and Developmental Biology, Maastricht University, Maastricht, The Netherlands.

\* Correspondence: sheetal.hardikar@hci.utah.edu; 801-213-6238

& Authors contributed equally

**Table S1.** Mean (standard deviation) and median (minimum, maximum) concentrations of all the metabolites across all samples

| Class          | Metabolite                      | Samples (n)       | Mean $\pm$          | Median (Min, Max)    |
|----------------|---------------------------------|-------------------|---------------------|----------------------|
|                |                                 |                   | Standard Deviation  |                      |
| Acylcarnitines | C0                              | 108               | 34.1 $\pm$ 7.53     | 34.1 (16.9, 54.1)    |
|                | C12                             | 71                | 0.1 $\pm$ 0.05      | 0.1 (0.1, 0.3)       |
|                | C12:1                           | 79                | 0.2 $\pm$ 0.05      | 0.1 (0.1, 0.4)       |
|                | C14                             | 69                | 0.0 $\pm$ 0.01      | 0.0 (0.0, 0.1)       |
|                | C14:1                           | 108               | 0.1 $\pm$ 0.04      | 0.1 (0.0, 0.2)       |
|                | C16                             | 108               | 0.1 $\pm$ 0.03      | 0.1 (0.1, 0.3)       |
|                | C18                             | 105               | 0.0 $\pm$ 0.01      | 0.0 (0.0, 0.1)       |
|                | C18:1                           | 108               | 0.1 $\pm$ 0.05      | 0.1 (0.0, 0.4)       |
|                | C18:2                           | 107               | 0.0 $\pm$ 0.02      | 0.0 (0.0, 0.1)       |
|                | C2                              | 108               | 5.8 $\pm$ 2.32      | 5.3 (2.3, 12.1)      |
|                | C3                              | 108               | 0.4 $\pm$ 0.13      | 0.4 (0.2, 0.8)       |
|                | C4                              | 108               | 0.2 $\pm$ 0.07      | 0.2 (0.1, 0.4)       |
|                | C5                              | 99                | 0.2 $\pm$ 0.05      | 0.1 (0.1, 0.3)       |
|                | ADMA                            | 108               | 0.4 $\pm$ 0.10      | 0.4 (0.3, 0.9)       |
|                | Amino Acids and Biogenic Amines | Alanine           | 108                 | 386.2 $\pm$ 114.72   |
| Arginine       |                                 | 108               | 71.0 $\pm$ 23.38    | 69.3 (9.9, 140.0)    |
| Asparagine     |                                 | 108               | 48.4 $\pm$ 11.38    | 47.1 (31.7, 108.0)   |
| Aspartic acid  |                                 | 76                | 7.3 $\pm$ 2.02      | 7.0 (5.0, 15.7)      |
| Citrulline     |                                 | 108               | 31.9 $\pm$ 8.18     | 31.7 (10.3, 53.6)    |
| Creatinine     |                                 | 108               | 72.5 $\pm$ 13.16    | 70.8 (45.7, 109.0)   |
| Glutamine      |                                 | 108               | 701.9 $\pm$ 109.56  | 713.5 (365.0, 970.0) |
| Glutamate      |                                 | 108               | 38.8 $\pm$ 20.27    | 34.4 (13.2, 114.0)   |
| Glycine        |                                 | 108               | 222.1 $\pm$ 70.51   | 211.0 (113.0, 456.0) |
| Histidine      |                                 | 108               | 78.8 $\pm$ 11.95    | 77.9 (46.2, 112.0)   |
| Isoleucine     |                                 | 108               | 72.2 $\pm$ 25.60    | 65.6 (29.2, 169.0)   |
| Kynurenine     |                                 | 108               | 2.5 $\pm$ 0.74      | 2.5 (1.4, 4.5)       |
| Leucine        |                                 | 108               | 132.5 $\pm$ 45.06   | 122.0 (62.4, 289.0)  |
| Lysine         |                                 | 108               | 201.6 $\pm$ 53.88   | 193.5 (106.0, 461.0) |
| Methionine     |                                 | 108               | 21.5 $\pm$ 7.67     | 20.0 (11.3, 64.7)    |
| Ornithine      |                                 | 108               | 79.9 $\pm$ 30.64    | 72.5 (26.5, 270.0)   |
| Phenylalanine  |                                 | 108               | 61.5 $\pm$ 13.93    | 59.8 (39.3, 118.0)   |
| Proline        |                                 | 108               | 201.9 $\pm$ 70.22   | 187.5 (71.3, 403.0)  |
| Sarcosine      |                                 | 108               | 2.5 $\pm$ 0.74      | 2.4 (1.4, 7.0)       |
| SDMA           |                                 | 108               | 0.5 $\pm$ 0.09      | 0.4 (0.2, 0.6)       |
| Serine         | 108                             | 100.9 $\pm$ 25.47 | 97.6 (49.7, 201.0)  |                      |
| T4_OH_Pro      | 108                             | 7.5 $\pm$ 3.41    | 6.9 (2.9, 18.4)     |                      |
| Taurine        | 108                             | 46.8 $\pm$ 15.79  | 44.0 (24.3, 144.0)  |                      |
| Threonine      | 108                             | 118.3 $\pm$ 30.26 | 117.5 (56.9, 275.0) |                      |

|                |                      |                |                  |                          |
|----------------|----------------------|----------------|------------------|--------------------------|
|                | Tryptophan           | 108            | 62.5 ± 15.16     | 60.1 (21.5, 111.0)       |
|                | Tyrosine             | 108            | 74.2 ± 26.80     | 68.7 (31.2, 170.0)       |
|                | Valine               | 108            | 241.0 ± 67.67    | 231.0 (147.0, 520.0)     |
| Hexose         | H1                   | 108            | 4600.1 ± 1285.66 | 4493.5 (1642.0, 13715.0) |
|                | SM_OH_C14_1          | 108            | 5.1 ± 1.32       | 4.9 (2.5, 10.0)          |
|                | SM_OH_C16_1          | 108            | 2.2 ± 0.55       | 2.2 (1.3, 3.7)           |
|                | SM_OH_C22_1          | 108            | 5.7 ± 1.33       | 5.5 (3.0, 10.1)          |
|                | SM_OH_C22_2          | 108            | 5.0 ± 1.18       | 4.8 (3.1, 8.3)           |
|                | SM_OH_C24_1          | 108            | 0.4 ± 0.11       | 0.4 (0.2, 0.7)           |
| Sphingolipids  | SM_C16:0             | 108            | 74.6 ± 12.87     | 73.6 (50.1, 119.0)       |
|                | SM_C16:1             | 108            | 10.5 ± 2.12      | 10.3 (6.5, 15.0)         |
|                | SM_C18:0             | 108            | 14.2 ± 3.07      | 13.7 (8.4, 23.8)         |
|                | SM_C18:1             | 108            | 6.7 ± 1.66       | 6.6 (3.7, 11.5)          |
|                | SM_C20:2             | 102            | 0.1 ± 0.06       | 0.1 (0.0, 0.3)           |
|                | SM_C24:0             | 108            | 7.5 ± 1.50       | 7.6 (3.8, 12.0)          |
|                | SM_C24:1             | 108            | 15.0 ± 3.47      | 14.8 (7.6, 26.4)         |
|                | SM_C26:0             | 108            | 0.0 ± 0.01       | 0.0 (0.0, 0.1)           |
|                | SM_C26:1             | 108            | 0.1 ± 0.03       | 0.1 (0.1, 0.2)           |
|                | LysoPC_a_C16:0       | 108            | 98.3 ± 23.80     | 95.0 (59.6, 193.0)       |
|                | LysoPC_a_C16:1       | 108            | 2.9 ± 0.92       | 2.7 (1.2, 6.1)           |
|                | LysoPC_a_C17:0       | 108            | 2.0 ± 0.72       | 1.9 (0.8, 6.2)           |
|                | LysoPC_a_C18:0       | 108            | 28.5 ± 8.00      | 28.8 (13.9, 67.1)        |
|                | LysoPC_a_C18:1       | 108            | 22.0 ± 6.52      | 21.1 (8.3, 39.9)         |
|                | LysoPC_a_C18:2       | 108            | 33.5 ± 12.70     | 31.6 (6.7, 75.1)         |
|                | LysoPC_a_C20:3       | 108            | 2.2 ± 0.71       | 2.1 (0.7, 3.8)           |
|                | Glycerophospholipids | LysoPC_a_C20:4 | 108              | 5.7 ± 1.92               |
| LysoPC_a_C28:1 |                      | 108            | 0.3 ± 0.07       | 0.3 (0.1, 0.5)           |
| PC_aa_C28:1    |                      | 108            | 3.3 ± 0.85       | 3.3 (1.7, 6.5)           |
| PC_aa_C30:0    |                      | 108            | 5.0 ± 1.78       | 4.9 (1.7, 11.0)          |
| PC_aa_C32:0    |                      | 108            | 24.5 ± 5.52      | 23.7 (14.4, 39.7)        |
| PC_aa_C32:1    |                      | 108            | 33.5 ± 19.65     | 28.3 (10.1, 117.0)       |
| PC_aa_C32:2    |                      | 108            | 8.6 ± 3.29       | 8.3 (1.7, 23.8)          |
| PC_aa_C32:3    |                      | 108            | 0.9 ± 0.23       | 0.8 (0.4, 1.5)           |
| PC_aa_C34:1    |                      | 108            | 353.2 ± 85.98    | 343.5 (183.0, 607.0)     |
| PC_aa_C34:2    |                      | 108            | 606.9 ± 90.77    | 611.5 (348.0, 844.0)     |
| PC_aa_C34:3    |                      | 108            | 27.2 ± 8.89      | 25.2 (12.1, 58.8)        |

---

|             |     |               |                      |
|-------------|-----|---------------|----------------------|
| PC_aa_C34:4 | 108 | 3.3 ± 1.48    | 3.0 (1.0, 7.8)       |
| PC_aa_C36:0 | 108 | 3.1 ± 0.86    | 3.0 (1.7, 5.5)       |
| PC_aa_C36:1 | 108 | 65.0 ± 20.13  | 64.0 (29.2, 151.0)   |
| PC_aa_C36:2 | 108 | 338.1 ± 62.95 | 338.5 (180.0, 473.0) |
| PC_aa_C36:3 | 108 | 192.8 ± 45.76 | 187.5 (74.6, 351.0)  |
| PC_aa_C36:4 | 108 | 263.4 ± 71.22 | 268.0 (147.0, 463.0) |
| PC_aa_C36:5 | 108 | 39.1 ± 19.92  | 35.1 (9.8, 120.0)    |
| PC_aa_C36:6 | 108 | 1.5 ± 0.57    | 1.4 (0.4, 3.1)       |
| PC_aa_C38:0 | 108 | 2.6 ± 0.80    | 2.5 (1.4, 5.2)       |
| PC_aa_C38:3 | 108 | 53.2 ± 15.60  | 50.1 (24.8, 104.0)   |
| PC_aa_C38:4 | 108 | 120.5 ± 35.27 | 121.5 (62.6, 244.0)  |
| PC_aa_C38:5 | 108 | 60.7 ± 16.74  | 61.1 (31.0, 99.8)    |
| PC_aa_C38:6 | 108 | 84.2 ± 27.22  | 81.5 (35.5, 170.0)   |
| PC_aa_C40:2 | 108 | 0.2 ± 0.07    | 0.2 (0.1, 0.5)       |
| PC_aa_C40:3 | 108 | 0.4 ± 0.09    | 0.4 (0.2, 0.7)       |
| PC_aa_C40:4 | 108 | 3.1 ± 0.98    | 2.8 (1.5, 7.7)       |
| PC_aa_C40:5 | 108 | 7.7 ± 2.50    | 7.5 (3.2, 15.8)      |
| PC_aa_C40:6 | 108 | 23.1 ± 8.04   | 21.8 (8.3, 48.0)     |
| PC_aa_C42:0 | 108 | 0.3 ± 0.09    | 0.3 (0.2, 0.5)       |
| PC_aa_C42:1 | 108 | 0.2 ± 0.04    | 0.2 (0.1, 0.3)       |
| PC_aa_C42:2 | 108 | 0.1 ± 0.03    | 0.1 (0.1, 0.2)       |
| PC_aa_C42:4 | 108 | 0.1 ± 0.02    | 0.1 (0.1, 0.2)       |
| PC_aa_C42:5 | 108 | 0.2 ± 0.07    | 0.2 (0.1, 0.5)       |
| PC_aa_C42:6 | 106 | 0.4 ± 0.09    | 0.4 (0.2, 0.7)       |
| PC_ae_C30:0 | 108 | 0.4 ± 0.12    | 0.4 (0.2, 0.7)       |
| PC_ae_C30:2 | 108 | 0.1 ± 0.02    | 0.1 (0.0, 0.1)       |
| PC_ae_C32:1 | 108 | 5.0 ± 1.11    | 4.9 (2.6, 7.9)       |
| PC_ae_C32:2 | 108 | 1.2 ± 0.29    | 1.2 (0.8, 2.4)       |
| PC_ae_C34:0 | 108 | 2.5 ± 0.74    | 2.4 (1.0, 5.0)       |
| PC_ae_C34:1 | 108 | 18.5 ± 4.11   | 17.7 (10.8, 28.1)    |
| PC_ae_C34:2 | 108 | 20.8 ± 5.27   | 19.6 (8.7, 34.2)     |
| PC_ae_C34:3 | 108 | 13.8 ± 3.78   | 13.3 (4.5, 24.0)     |
| PC_ae_C36:0 | 108 | 1.0 ± 0.31    | 1.0 (0.6, 2.2)       |
| PC_ae_C36:1 | 108 | 12.6 ± 2.99   | 12.2 (6.4, 20.3)     |
| PC_ae_C36:2 | 108 | 22.9 ± 5.59   | 22.9 (10.2, 39.1)    |
| PC_ae_C36:3 | 108 | 12.0 ± 3.03   | 11.5 (4.0, 20.2)     |

---

|             |     |             |                   |
|-------------|-----|-------------|-------------------|
| PC_ae_C36:4 | 108 | 24.2 ± 7.30 | 23.4 (12.0, 54.5) |
| PC_ae_C36:5 | 108 | 16.0 ± 4.59 | 15.8 (8.0, 29.9)  |
| PC_ae_C38:0 | 108 | 2.3 ± 0.72  | 2.3 (1.2, 4.9)    |
| PC_ae_C38:2 | 108 | 2.3 ± 0.54  | 2.3 (0.9, 4.0)    |
| PC_ae_C38:3 | 108 | 5.1 ± 1.23  | 5.0 (2.4, 8.3)    |
| PC_ae_C38:4 | 108 | 16.3 ± 3.74 | 15.8 (9.8, 26.8)  |
| PC_ae_C38:5 | 108 | 20.8 ± 4.88 | 20.4 (11.2, 34.3) |
| PC_ae_C38:6 | 108 | 8.6 ± 2.36  | 8.5 (4.5, 14.1)   |
| PC_ae_C40:1 | 108 | 1.1 ± 0.27  | 1.1 (0.6, 1.8)    |
| PC_ae_C40:2 | 108 | 1.7 ± 0.40  | 1.6 (1.0, 3.1)    |
| PC_ae_C40:3 | 108 | 0.9 ± 0.20  | 0.9 (0.5, 1.5)    |
| PC_ae_C40:4 | 108 | 2.2 ± 0.49  | 2.1 (1.2, 3.5)    |
| PC_ae_C40:5 | 108 | 3.5 ± 0.71  | 3.5 (2.1, 5.4)    |
| PC_ae_C40:6 | 108 | 4.7 ± 1.21  | 4.7 (2.5, 7.9)    |
| PC_ae_C42:1 | 108 | 0.3 ± 0.06  | 0.3 (0.2, 0.6)    |
| PC_ae_C42:2 | 108 | 0.5 ± 0.11  | 0.5 (0.2, 0.8)    |
| PC_ae_C42:3 | 108 | 0.6 ± 0.13  | 0.5 (0.3, 0.9)    |
| PC_ae_C42:4 | 108 | 0.7 ± 0.20  | 0.7 (0.3, 1.5)    |
| PC_ae_C42:5 | 108 | 1.6 ± 0.39  | 1.6 (0.9, 3.1)    |
| PC_ae_C44:3 | 107 | 0.1 ± 0.01  | 0.1 (0.0, 0.1)    |
| PC_ae_C44:4 | 108 | 0.2 ± 0.07  | 0.2 (0.1, 0.4)    |
| PC_ae_C44:5 | 108 | 1.1 ± 0.34  | 1.1 (0.5, 2.2)    |
| PC_ae_C44:6 | 108 | 0.8 ± 0.23  | 0.8 (0.3, 1.4)    |

C0 Carnitine; C12 Decanoylcarnitine; C12:1 Decenoylcarnitine; C14 Tetradecanoylcarnitine; C14:1 Tetradecenoylcarnitine; C16 Hexadecanoylcarnitine; C18 Octadecanoylcarnitine; C18:1 Octadecenoylcarnitine; C18:2 Octadecadienylcarnitine; C2 Acetylcarnitine; C3 Propionylcarnitine; C4 Butyrylcarnitine; C5 Valerylcarnitine

ADMA Asymmetric dimethylarginine

SDMA Symmetric dimethylarginine

T4\_OH\_Pro Trans-4-Hydroxyproline

LysoPC\_a Lyso-phosphatidylcholines

PC\_aa Phosphatidylcholines di-alkyl

PC\_ae Phosphatidylcholines alkyl-acyl

**Table S2.** Age- and sex-adjusted P-values for mean metabolite levels for all 133 metabolites for pre-collection factors (excluding age and sex) in the PRÄVENT cohort (N=108).

| Class                           | Metabolite    | Time of Day<br>(Ref: Morning) |           | Sun<br>Season<br>(Ref:<br>Low<br>Sun) | Calendar Season<br>(Ref: Winter) |        |      | Fasting State (Ref: $\geq 3$ ) |                 |                 | Physical<br>Activity<br><12 Hrs<br>(Ref:<br>No)<br>Yes | NSAID<br>Use<br><24 Hrs<br>(Ref:<br>No)<br>Yes | Alcohol<br>Use<br><24 Hrs<br>(Ref:<br>No)<br>Yes | Tobacco<br>Use<br><24 Hrs<br>(Ref:<br>No)<br>Yes |
|---------------------------------|---------------|-------------------------------|-----------|---------------------------------------|----------------------------------|--------|------|--------------------------------|-----------------|-----------------|--------------------------------------------------------|------------------------------------------------|--------------------------------------------------|--------------------------------------------------|
|                                 |               | Midday                        | Afternoon | High<br>Sun                           | Spring                           | Summer | Fall | <1<br>Hours                    | 1 - <2<br>Hours | 2 - <3<br>Hours | Yes                                                    | Yes                                            | Yes                                              | Yes                                              |
| Acylcarnitines                  | C0            | 0.87                          | 0.05      | 0.30                                  | 0.01                             | 0.07   | 0.04 | 0.85                           | 0.39            | 0.31            | 0.29                                                   | 0.52                                           | 0.89                                             | 0.93                                             |
|                                 | C12           | 0.44                          | 0.01      | 0.16                                  | 0.57                             | 0.00   | 0.11 | 0.03                           | 0.55            | 0.02            | 0.06                                                   | 0.05                                           | 0.73                                             | 0.10                                             |
|                                 | C12:1         | 0.43                          | 0.69      | 0.12                                  | 0.46                             | 0.00   | 0.04 | 0.01                           | 0.62            | 0.09            | 0.18                                                   | 0.01                                           | 0.47                                             | 0.23                                             |
|                                 | C14           | 0.87                          | 0.06      | 0.83                                  | 0.69                             | 0.00   | 0.49 | 0.16                           | 0.97            | 0.14            | 0.21                                                   | 0.55                                           | 0.37                                             | 0.21                                             |
|                                 | C14:1         | 0.90                          | 0.03      | 0.29                                  | 0.59                             | 0.01   | 0.43 | 0.04                           | 0.28            | 0.78            | 0.10                                                   | 0.05                                           | 0.27                                             | 0.33                                             |
|                                 | C16           | 0.51                          | 0.08      | 0.42                                  | 0.22                             | 0.21   | 0.77 | 0.09                           | 0.36            | 0.86            | 0.31                                                   | 0.10                                           | 0.33                                             | 0.61                                             |
|                                 | C18           | 0.70                          | 0.67      | 0.07                                  | 0.28                             | 0.67   | 0.67 | 0.45                           | 0.94            | 0.48            | 0.70                                                   | 0.13                                           | 0.28                                             | 0.52                                             |
|                                 | C18:1         | 0.79                          | 0.06      | 0.63                                  | 0.42                             | 0.35   | 0.69 | 0.09                           | 0.23            | 0.52            | 0.20                                                   | 0.20                                           | 0.69                                             | 0.87                                             |
|                                 | C18:2         | 0.31                          | 0.11      | 0.48                                  | 0.60                             | 0.78   | 0.98 | 0.13                           | 0.34            | 0.30            | 0.01                                                   | 0.67                                           | 0.29                                             | 0.19                                             |
|                                 | C2            | 0.88                          | 0.57      | 0.12                                  | 0.36                             | 0.12   | 0.84 | 0.06                           | 0.11            | 0.52            | 0.05                                                   | 0.07                                           | 0.39                                             | 0.53                                             |
|                                 | C3            | 0.86                          | 0.09      | 0.78                                  | 0.07                             | 0.28   | 0.41 | 0.94                           | 0.25            | 0.26            | 0.93                                                   | 0.58                                           | 0.19                                             | 0.53                                             |
|                                 | C4            | 0.64                          | 0.25      | 0.97                                  | 0.23                             | 0.43   | 0.99 | 0.79                           | 0.23            | 0.54            | 0.59                                                   | 0.95                                           | 0.05                                             | 0.66                                             |
|                                 | C5            | 0.40                          | 0.47      | 0.44                                  | 0.14                             | 0.13   | 0.77 | 0.63                           | 0.56            | 0.41            | 0.68                                                   | 0.83                                           | 0.96                                             | 0.51                                             |
|                                 | ADMA          | 0.58                          | 0.53      | 0.93                                  | 0.68                             | 0.06   | 0.14 | 0.71                           | 0.16            | 0.23            | 1.00                                                   | 0.20                                           | 0.41                                             | 0.78                                             |
| Amino Acids and Biogenic Amines | Alanine       | 0.99                          | 0.26      | 0.82                                  | 0.22                             | 0.34   | 0.45 | 0.17                           | 0.77            | 0.04            | 0.02                                                   | 0.03                                           | 0.89                                             | 0.44                                             |
|                                 | Arginine      | 0.02                          | 0.08      | 0.59                                  | 0.37                             | 0.75   | 0.52 | 0.28                           | 0.19            | 0.30            | 0.58                                                   | 0.08                                           | 0.29                                             | 0.04                                             |
|                                 | Asparagine    | 0.88                          | 0.02      | 0.27                                  | 0.45                             | 0.42   | 0.85 | 0.55                           | 0.78            | 0.09            | 0.95                                                   | 0.49                                           | 0.46                                             | 0.09                                             |
|                                 | Aspartic acid | 0.14                          | 0.40      | 0.28                                  | 0.60                             | 0.07   | 0.13 | 0.69                           | 0.23            | 0.98            | 0.97                                                   | 0.56                                           | 0.71                                             | 0.06                                             |
|                                 | Citrulline    | 0.43                          | 0.54      | 0.58                                  | 0.04                             | 0.77   | 0.30 | 0.81                           | 0.02            | 0.67            | 0.09                                                   | 0.23                                           | 0.21                                             | 0.46                                             |
|                                 | Creatinine    | 0.49                          | 0.80      | 0.49                                  | 0.83                             | 0.32   | 0.44 | 0.86                           | 0.79            | 0.98            | 0.84                                                   | 0.29                                           | 0.37                                             | 0.51                                             |
|                                 | Glutamine     | 0.60                          | 0.40      | 0.16                                  | 0.07                             | 0.98   | 0.45 | 0.59                           | 0.85            | 0.71            | 0.28                                                   | 0.68                                           | 0.54                                             | 0.72                                             |
|                                 | Glutamate     | 0.44                          | 0.72      | 0.18                                  | 0.17                             | 0.77   | 0.30 | 0.79                           | 0.57            | 0.39            | 0.74                                                   | 0.06                                           | 0.40                                             | 0.00                                             |
|                                 | Glycine       | 0.41                          | 0.91      | 0.10                                  | 0.62                             | 0.77   | 0.96 | 0.67                           | 0.11            | 0.44            | 0.41                                                   | 0.53                                           | 0.61                                             | 0.74                                             |
|                                 | Histidine     | 0.68                          | 0.35      | 0.83                                  | 0.17                             | 0.46   | 0.33 | 0.47                           | 0.84            | 0.21            | 0.83                                                   | 0.59                                           | 0.46                                             | 0.94                                             |
|                                 | Isoleucine    | 0.15                          | 0.08      | 0.41                                  | 0.91                             | 0.50   | 0.66 | 0.50                           | 0.42            | 0.83            | 0.89                                                   | 0.51                                           | 0.15                                             | 0.47                                             |
|                                 | Kynurenine    | 0.11                          | 0.14      | 0.53                                  | 0.40                             | 0.33   | 0.35 | 0.52                           | 0.62            | 0.81            | 0.94                                                   | 0.86                                           | 0.44                                             | 0.55                                             |
|                                 | Leucine       | 0.11                          | 0.35      | 0.36                                  | 0.81                             | 0.87   | 0.98 | 0.14                           | 0.22            | 0.49            | 0.87                                                   | 0.83                                           | 0.25                                             | 0.72                                             |
|                                 | Lysine        | 0.48                          | 0.76      | 0.85                                  | 0.02                             | 0.10   | 0.04 | 0.19                           | 0.71            | 0.55            | 0.43                                                   | 0.84                                           | 0.58                                             | 0.87                                             |
| Methionine                      | 0.75          | 0.65                          | 0.69      | 0.08                                  | 0.53                             | 0.71   | 0.38 | 0.24                           | 0.07            | 0.56            | 0.40                                                   | 0.07                                           | 0.40                                             |                                                  |
| Ornithine                       | 0.57          | 0.80                          | 0.41      | 0.46                                  | 0.91                             | 0.68   | 0.79 | 0.43                           | 0.03            | 0.83            | 0.84                                                   | 0.56                                           | 0.01                                             |                                                  |
| Phenylalanine                   | 0.27          | 0.07                          | 0.83      | 0.46                                  | 0.47                             | 0.42   | 0.91 | 0.69                           | 0.12            | 0.91            | 0.79                                                   | 0.33                                           | 0.26                                             |                                                  |
| Proline                         | 0.69          | 0.25                          | 0.55      | 0.05                                  | 0.42                             | 0.75   | 0.70 | 0.96                           | 0.15            | 0.08            | 0.26                                                   | 0.67                                           | 0.50                                             |                                                  |

|                      |                    |      |      |      |      |      |      |      |      |      |      |      |      |      |
|----------------------|--------------------|------|------|------|------|------|------|------|------|------|------|------|------|------|
| Hexose               | Sarcosine          | 0.28 | 0.78 | 0.58 | 0.13 | 0.64 | 0.27 | 0.65 | 0.88 | 0.69 | 0.82 | 0.77 | 0.22 | 0.44 |
|                      | SDMA               | 0.77 | 0.58 | 0.96 | 0.36 | 0.53 | 0.42 | 0.71 | 0.57 | 0.55 | 0.59 | 0.98 | 0.34 | 0.11 |
|                      | Serine             | 0.94 | 0.08 | 0.62 | 0.81 | 0.39 | 0.52 | 0.90 | 0.08 | 0.37 | 0.59 | 0.09 | 0.12 | 0.93 |
|                      | T4_OH_Pro          | 0.37 | 0.55 | 0.05 | 0.02 | 0.70 | 0.62 | 0.54 | 0.78 | 0.46 | 0.02 | 0.95 | 0.85 | 0.56 |
|                      | Taurine            | 0.51 | 0.84 | 0.64 | 0.24 | 0.89 | 0.82 | 0.38 | 0.11 | 0.34 | 0.35 | 0.93 | 0.66 | 0.65 |
|                      | Threonine          | 0.57 | 0.19 | 0.69 | 0.10 | 0.93 | 0.47 | 0.92 | 0.68 | 0.32 | 0.20 | 0.19 | 0.39 | 0.23 |
|                      | Tryptophan         | 0.28 | 0.96 | 0.76 | 0.90 | 0.30 | 0.71 | 0.95 | 0.87 | 0.02 | 0.73 | 0.52 | 0.43 | 0.77 |
|                      | Tyrosine           | 0.95 | 0.67 | 0.49 | 0.07 | 0.69 | 0.98 | 0.40 | 0.36 | 0.76 | 0.99 | 0.52 | 0.70 | 0.81 |
|                      | Valine             | 0.38 | 0.29 | 0.73 | 0.63 | 0.42 | 0.55 | 0.77 | 0.96 | 0.76 | 0.96 | 0.41 | 0.11 | 0.95 |
|                      | H1                 | 0.49 | 0.69 | 0.14 | 0.15 | 0.84 | 0.06 | 0.25 | 0.92 | 0.71 | 0.50 | 0.14 | 0.44 | 0.73 |
| Sphingolipids        | SM_OH_C1<br>4_1    | 0.88 | 0.35 | 0.94 | 0.68 | 0.83 | 0.81 | 0.93 | 0.60 | 0.37 | 0.38 | 0.12 | 0.10 | 0.83 |
|                      | SM_OH_C1<br>6_1    | 0.63 | 0.42 | 0.48 | 0.93 | 0.73 | 0.64 | 0.94 | 0.14 | 0.57 | 0.13 | 0.30 | 0.32 | 0.83 |
|                      | SM_OH_C2<br>2_1    | 0.54 | 0.82 | 0.39 | 0.96 | 1.00 | 0.73 | 0.86 | 0.16 | 0.17 | 0.38 | 0.07 | 0.36 | 0.45 |
|                      | SM_OH_C2<br>2_2    | 0.42 | 0.61 | 0.89 | 0.75 | 0.87 | 0.65 | 0.96 | 0.25 | 0.31 | 0.30 | 0.05 | 0.34 | 0.84 |
|                      | SM_OH_C2<br>4_1    | 0.84 | 0.32 | 0.96 | 0.55 | 0.49 | 0.61 | 0.52 | 0.16 | 0.07 | 0.21 | 0.63 | 0.25 | 0.19 |
|                      | SM_C16:0           | 0.89 | 0.78 | 0.76 | 0.24 | 0.92 | 0.75 | 0.63 | 0.77 | 0.23 | 0.97 | 0.29 | 0.79 | 0.98 |
|                      | SM_C16:1           | 0.66 | 0.83 | 0.18 | 0.02 | 0.63 | 0.08 | 0.51 | 0.92 | 0.56 | 0.07 | 0.02 | 0.91 | 0.77 |
|                      | SM_C18:0           | 0.26 | 0.94 | 0.87 | 0.98 | 0.76 | 0.41 | 0.96 | 0.16 | 0.50 | 0.03 | 0.35 | 0.27 | 0.31 |
|                      | SM_C18:1           | 0.28 | 0.78 | 0.42 | 0.39 | 0.88 | 0.10 | 0.81 | 0.16 | 0.39 | 0.01 | 0.20 | 0.27 | 0.46 |
|                      | SM_C20:2           | 0.74 | 0.28 | 0.38 | 0.17 | 0.94 | 0.03 | 0.47 | 0.39 | 0.34 | 0.52 | 0.91 | 0.09 | 0.54 |
| Glycerophospholipids | SM_C24:0           | 0.90 | 0.80 | 0.54 | 0.29 | 0.77 | 0.48 | 0.79 | 0.49 | 0.11 | 0.44 | 0.24 | 0.70 | 0.37 |
|                      | SM_C24:1           | 0.62 | 0.51 | 0.15 | 0.13 | 0.76 | 0.22 | 0.41 | 0.62 | 0.81 | 0.84 | 0.74 | 0.94 | 0.55 |
|                      | SM_C26:0           | 0.44 | 0.45 | 0.71 | 0.90 | 0.24 | 0.91 | 0.96 | 0.16 | 0.69 | 0.38 | 0.67 | 0.94 | 0.29 |
|                      | SM_C26:1           | 0.56 | 0.49 | 0.11 | 0.13 | 0.80 | 0.53 | 0.31 | 0.82 | 0.70 | 0.30 | 0.78 | 0.76 | 0.42 |
|                      | LysoPC_a_<br>C16:0 | 0.48 | 0.85 | 0.61 | 0.60 | 0.92 | 0.84 | 0.52 | 0.45 | 0.83 | 0.84 | 0.81 | 0.03 | 0.08 |
|                      | LysoPC_a_<br>C16:1 | 0.59 | 0.20 | 0.17 | 0.50 | 0.43 | 0.38 | 0.71 | 0.25 | 0.88 | 0.23 | 0.51 | 0.02 | 0.40 |
|                      | LysoPC_a_<br>C17:0 | 0.65 | 0.79 | 0.68 | 0.67 | 0.79 | 0.32 | 0.98 | 0.11 | 0.27 | 0.72 | 0.81 | 0.74 | 0.34 |
|                      | LysoPC_a_<br>C18:0 | 0.96 | 0.80 | 0.69 | 0.70 | 0.74 | 0.80 | 0.83 | 0.44 | 0.67 | 0.81 | 0.83 | 0.55 | 0.16 |
|                      | LysoPC_a_<br>C18:1 | 0.94 | 0.85 | 0.29 | 0.93 | 0.96 | 0.88 | 0.11 | 0.98 | 0.52 | 0.54 | 0.88 | 0.03 | 0.46 |
|                      | LysoPC_a_<br>C18:2 | 0.43 | 0.08 | 0.57 | 0.67 | 0.37 | 0.46 | 0.11 | 0.87 | 0.94 | 0.51 | 0.39 | 0.98 | 0.39 |
| LysoPC_a_<br>C20:3   | 0.33               | 0.64 | 0.86 | 0.81 | 0.86 | 0.92 | 0.37 | 0.83 | 0.55 | 0.21 | 0.80 | 0.10 | 0.83 |      |

|                |      |      |      |      |      |      |      |      |      |      |      |      |      |
|----------------|------|------|------|------|------|------|------|------|------|------|------|------|------|
| LysoPC_a_C20:4 | 0.41 | 0.88 | 0.19 | 0.27 | 0.92 | 0.13 | 0.60 | 0.36 | 0.63 | 0.10 | 0.51 | 0.28 | 0.84 |
| LysoPC_a_C28:1 | 0.97 | 0.53 | 0.85 | 0.74 | 0.95 | 0.33 | 0.76 | 0.36 | 0.07 | 0.20 | 0.14 | 0.66 | 0.46 |
| PC_aa_C28:1    | 0.91 | 0.66 | 0.69 | 0.27 | 0.61 | 0.61 | 0.92 | 0.72 | 0.35 | 0.37 | 0.08 | 0.92 | 0.97 |
| PC_aa_C30:0    | 0.58 | 0.67 | 0.94 | 0.57 | 0.31 | 0.99 | 0.47 | 0.88 | 0.03 | 0.28 | 0.24 | 0.04 | 0.81 |
| PC_aa_C32:0    | 0.48 | 0.68 | 0.65 | 0.17 | 0.24 | 0.35 | 0.56 | 1.00 | 0.10 | 0.37 | 0.15 | 0.08 | 0.96 |
| PC_aa_C32:1    | 0.44 | 0.21 | 0.36 | 0.50 | 0.18 | 0.32 | 0.70 | 0.12 | 0.65 | 0.12 | 0.24 | 0.01 | 0.90 |
| PC_aa_C32:2    | 0.88 | 0.87 | 0.85 | 0.51 | 0.56 | 0.87 | 0.42 | 0.42 | 0.29 | 0.93 | 0.47 | 0.46 | 0.96 |
| PC_aa_C32:3    | 0.61 | 0.26 | 0.38 | 0.22 | 0.31 | 0.93 | 0.57 | 0.93 | 0.30 | 0.31 | 0.38 | 0.97 | 0.85 |
| PC_aa_C34:1    | 0.38 | 0.27 | 0.27 | 0.70 | 0.16 | 0.46 | 0.80 | 0.45 | 0.52 | 0.09 | 0.17 | 0.00 | 0.70 |
| PC_aa_C34:2    | 0.81 | 0.85 | 0.58 | 0.42 | 0.91 | 0.82 | 0.88 | 0.57 | 0.52 | 0.47 | 0.50 | 0.32 | 0.34 |
| PC_aa_C34:3    | 0.92 | 0.74 | 0.30 | 0.31 | 0.28 | 0.94 | 0.71 | 0.41 | 0.38 | 0.37 | 0.48 | 0.18 | 0.97 |
| PC_aa_C34:4    | 0.38 | 0.67 | 0.68 | 0.27 | 0.22 | 0.50 | 0.49 | 0.60 | 0.16 | 0.11 | 0.16 | 0.13 | 0.60 |
| PC_aa_C36:0    | 0.59 | 0.89 | 0.72 | 0.86 | 0.40 | 0.24 | 0.43 | 0.23 | 0.01 | 0.83 | 0.87 | 0.06 | 0.75 |
| PC_aa_C36:1    | 0.77 | 0.98 | 0.33 | 0.60 | 0.28 | 0.92 | 0.96 | 0.32 | 0.39 | 0.06 | 0.42 | 0.01 | 0.79 |
| PC_aa_C36:2    | 0.89 | 0.83 | 0.39 | 0.09 | 0.60 | 0.95 | 0.51 | 0.49 | 0.96 | 0.47 | 0.58 | 0.66 | 0.44 |
| PC_aa_C36:3    | 0.25 | 0.60 | 0.98 | 0.27 | 0.39 | 0.86 | 0.90 | 0.28 | 0.50 | 0.28 | 0.55 | 0.07 | 0.62 |
| PC_aa_C36:4    | 0.12 | 0.25 | 0.36 | 0.11 | 0.17 | 0.06 | 0.47 | 0.99 | 0.64 | 0.05 | 0.08 | 0.03 | 0.53 |
| PC_aa_C36:5    | 0.20 | 0.88 | 0.15 | 0.66 | 0.32 | 0.89 | 0.94 | 0.71 | 0.03 | 0.19 | 0.53 | 0.71 | 0.69 |
| PC_aa_C36:6    | 0.64 | 0.39 | 0.46 | 0.99 | 0.54 | 0.23 | 0.68 | 0.78 | 0.01 | 0.34 | 0.46 | 0.76 | 0.64 |
| PC_aa_C38:0    | 0.98 | 0.32 | 0.74 | 0.27 | 0.38 | 0.56 | 0.85 | 0.54 | 0.02 | 0.97 | 0.69 | 0.07 | 0.42 |
| PC_aa_C38:3    | 0.25 | 0.58 | 0.79 | 0.17 | 0.21 | 0.47 | 0.45 | 0.44 | 0.46 | 0.11 | 0.49 | 0.27 | 0.65 |
| PC_aa_C38:4    | 0.16 | 0.24 | 0.28 | 0.02 | 0.07 | 0.02 | 0.25 | 0.80 | 0.60 | 0.05 | 0.07 | 0.27 | 0.34 |
| PC_aa_C38:5    | 0.15 | 0.37 | 0.19 | 0.18 | 0.09 | 0.33 | 0.61 | 0.67 | 0.04 | 0.06 | 0.46 | 0.23 | 0.89 |
| PC_aa_C38:6    | 0.73 | 0.70 | 0.54 | 0.52 | 0.56 | 0.30 | 0.90 | 0.30 | 0.13 | 0.58 | 0.26 | 0.82 | 0.23 |
| PC_aa_C40:2    | 0.94 | 0.08 | 0.58 | 0.77 | 0.47 | 0.36 | 0.87 | 0.72 | 0.03 | 0.24 | 0.60 | 0.19 | 0.86 |
| PC_aa_C40:3    | 0.36 | 0.38 | 0.87 | 0.17 | 0.20 | 0.72 | 0.71 | 0.74 | 0.00 | 0.75 | 0.81 | 0.61 | 0.48 |
| PC_aa_C40:4    | 0.10 | 0.18 | 0.85 | 0.16 | 0.10 | 0.10 | 0.54 | 0.41 | 0.62 | 0.06 | 0.07 | 0.05 | 0.64 |
| PC_aa_C40:5    | 0.28 | 0.22 | 0.49 | 0.19 | 0.07 | 0.28 | 0.49 | 0.91 | 0.33 | 0.05 | 0.27 | 0.14 | 0.74 |
| PC_aa_C40:6    | 0.92 | 0.51 | 0.38 | 0.75 | 0.47 | 0.36 | 0.60 | 0.45 | 0.26 | 0.45 | 0.22 | 0.41 | 0.16 |
| PC_aa_C42:0    | 0.85 | 0.17 | 0.80 | 0.55 | 0.84 | 0.33 | 0.54 | 0.20 | 0.04 | 0.47 | 0.12 | 0.02 | 0.61 |
| PC_aa_C42:1    | 0.80 | 0.16 | 0.78 | 0.43 | 0.86 | 0.34 | 0.67 | 0.37 | 0.06 | 0.15 | 0.71 | 0.03 | 0.84 |
| PC_aa_C42:2    | 0.69 | 0.31 | 0.99 | 0.63 | 0.54 | 0.45 | 0.61 | 0.17 | 0.02 | 0.08 | 0.46 | 0.02 | 0.53 |
| PC_aa_C42:4    | 0.28 | 0.64 | 0.19 | 0.40 | 0.21 | 0.53 | 0.59 | 0.99 | 0.03 | 0.77 | 0.53 | 0.32 | 0.05 |
| PC_aa_C42:5    | 0.19 | 0.80 | 0.54 | 0.16 | 0.03 | 0.14 | 0.57 | 0.50 | 0.02 | 0.70 | 0.33 | 0.89 | 0.82 |
| PC_aa_C42:6    | 0.51 | 0.18 | 0.08 | 0.29 | 0.58 | 0.73 | 0.48 | 0.46 | 0.11 | 0.55 | 0.46 | 0.53 | 0.51 |
| PC_ae_C30:0    | 0.64 | 0.94 | 0.17 | 0.92 | 0.62 | 0.33 | 0.71 | 0.78 | 0.01 | 0.83 | 0.20 | 0.82 | 0.17 |
| PC_ae_C30:2    | 0.57 | 0.55 | 0.17 | 0.07 | 0.72 | 0.82 | 0.83 | 0.92 | 0.33 | 0.09 | 0.20 | 0.18 | 0.67 |
| PC_ae_C32:1    | 0.67 | 0.73 | 0.75 | 0.18 | 0.85 | 0.77 | 0.83 | 0.35 | 0.08 | 0.56 | 0.27 | 0.68 | 0.11 |
| PC_ae_C32:2    | 0.70 | 0.46 | 0.51 | 0.06 | 0.58 | 0.98 | 0.37 | 0.65 | 0.09 | 0.13 | 0.07 | 0.53 | 0.09 |
| PC_ae_C34:0    | 0.61 | 0.95 | 0.88 | 0.83 | 0.78 | 0.32 | 0.32 | 0.24 | 0.01 | 0.65 | 0.70 | 0.60 | 0.90 |
| PC_ae_C34:1    | 0.43 | 0.60 | 1.00 | 0.66 | 0.53 | 0.90 | 0.83 | 0.57 | 0.05 | 0.25 | 0.19 | 0.27 | 0.18 |



|             |      |      |      |      |      |      |      |      |      |      |      |      |      |
|-------------|------|------|------|------|------|------|------|------|------|------|------|------|------|
| PC_ae_C34:2 | 0.13 | 0.86 | 0.83 | 0.28 | 0.54 | 0.62 | 0.41 | 0.24 | 0.44 | 0.18 | 0.21 | 0.57 | 0.07 |
| PC_ae_C34:3 | 0.79 | 0.95 | 0.90 | 0.37 | 0.76 | 0.57 | 0.98 | 0.62 | 0.17 | 0.83 | 0.21 | 0.63 | 0.07 |
| PC_ae_C36:0 | 0.83 | 0.92 | 0.73 | 0.86 | 0.43 | 0.50 | 0.40 | 0.70 | 0.12 | 0.53 | 0.68 | 0.56 | 0.13 |
| PC_ae_C36:1 | 0.39 | 0.93 | 0.81 | 0.78 | 0.52 | 0.60 | 0.59 | 0.49 | 0.04 | 0.31 | 0.22 | 0.35 | 0.81 |
| PC_ae_C36:2 | 0.76 | 0.60 | 0.45 | 0.45 | 0.90 | 0.35 | 0.56 | 0.61 | 0.27 | 0.81 | 0.56 | 0.31 | 0.70 |
| PC_ae_C36:3 | 0.16 | 0.69 | 0.57 | 0.19 | 0.76 | 0.82 | 0.68 | 0.22 | 0.18 | 0.17 | 0.41 | 0.42 | 0.02 |
| PC_ae_C36:4 | 0.03 | 0.08 | 0.76 | 0.03 | 0.24 | 0.12 | 0.62 | 0.32 | 0.37 | 0.01 | 0.01 | 0.31 | 0.07 |
| PC_ae_C36:5 | 0.13 | 0.42 | 0.24 | 0.03 | 0.22 | 0.28 | 0.94 | 0.78 | 0.17 | 0.04 | 0.03 | 0.48 | 0.24 |
| PC_ae_C38:0 | 0.63 | 0.46 | 0.21 | 0.44 | 0.27 | 0.48 | 0.81 | 0.70 | 0.01 | 0.28 | 0.57 | 0.47 | 0.59 |
| PC_ae_C38:2 | 0.93 | 0.96 | 0.81 | 0.19 | 0.35 | 0.53 | 0.52 | 0.84 | 0.06 | 0.95 | 0.71 | 0.74 | 0.80 |
| PC_ae_C38:3 | 0.16 | 0.96 | 0.35 | 0.73 | 0.98 | 0.52 | 0.96 | 0.77 | 0.25 | 0.23 | 0.57 | 0.78 | 0.24 |
| PC_ae_C38:4 | 0.09 | 0.51 | 0.54 | 0.11 | 0.38 | 0.21 | 0.95 | 0.92 | 0.19 | 0.05 | 0.02 | 0.49 | 0.03 |
| PC_ae_C38:5 | 0.19 | 0.26 | 0.30 | 0.00 | 0.08 | 0.05 | 0.78 | 0.41 | 0.10 | 0.03 | 0.05 | 0.36 | 0.04 |
| PC_ae_C38:6 | 0.40 | 0.98 | 0.35 | 0.14 | 0.36 | 0.94 | 0.73 | 0.94 | 0.04 | 0.16 | 0.57 | 0.61 | 0.49 |
| PC_ae_C40:1 | 0.66 | 0.60 | 0.41 | 0.40 | 0.30 | 0.56 | 0.82 | 0.57 | 0.02 | 0.14 | 0.55 | 0.52 | 0.30 |
| PC_ae_C40:2 | 0.65 | 0.79 | 0.45 | 0.85 | 0.77 | 0.27 | 0.62 | 0.24 | 0.41 | 0.43 | 0.75 | 0.24 | 0.57 |
| PC_ae_C40:3 | 0.71 | 0.43 | 0.09 | 0.80 | 0.49 | 0.16 | 0.93 | 0.40 | 0.21 | 0.88 | 0.86 | 0.35 | 0.50 |
| PC_ae_C40:4 | 0.41 | 0.97 | 0.15 | 0.58 | 0.71 | 0.74 | 0.83 | 0.47 | 0.06 | 0.52 | 0.10 | 0.61 | 0.08 |
| PC_ae_C40:5 | 0.42 | 0.95 | 0.95 | 0.50 | 0.62 | 0.89 | 0.73 | 0.28 | 0.03 | 0.28 | 0.39 | 0.98 | 0.28 |
| PC_ae_C40:6 | 0.88 | 0.22 | 0.84 | 0.89 | 0.72 | 0.19 | 0.92 | 0.20 | 0.01 | 0.87 | 0.48 | 0.05 | 0.98 |
| PC_ae_C42:1 | 0.57 | 0.89 | 0.47 | 0.01 | 0.02 | 0.15 | 0.22 | 0.93 | 0.06 | 0.45 | 0.20 | 0.76 | 0.25 |
| PC_ae_C42:2 | 0.68 | 0.40 | 0.26 | 0.69 | 0.53 | 0.12 | 0.66 | 0.59 | 0.02 | 0.83 | 0.88 | 0.22 | 0.44 |
| PC_ae_C42:3 | 0.83 | 0.17 | 0.14 | 0.54 | 0.99 | 0.04 | 0.90 | 0.37 | 0.03 | 0.31 | 0.23 | 0.12 | 0.99 |
| PC_ae_C42:4 | 0.38 | 0.76 | 0.04 | 0.94 | 0.66 | 0.57 | 0.85 | 0.36 | 0.10 | 0.84 | 0.88 | 0.54 | 0.35 |
| PC_ae_C42:5 | 0.58 | 1.00 | 0.67 | 0.33 | 0.68 | 0.91 | 0.69 | 0.65 | 0.13 | 0.50 | 0.78 | 0.61 | 0.34 |
| PC_ae_C44:3 | 0.19 | 0.24 | 0.26 | 0.27 | 0.65 | 0.25 | 0.42 | 0.34 | 0.04 | 0.30 | 0.66 | 0.17 | 0.40 |
| PC_ae_C44:4 | 0.95 | 0.53 | 0.15 | 0.88 | 0.40 | 0.25 | 0.77 | 0.94 | 0.34 | 0.82 | 0.48 | 0.42 | 0.63 |
| PC_ae_C44:5 | 0.43 | 0.71 | 0.44 | 0.18 | 0.76 | 0.69 | 0.71 | 0.98 | 0.41 | 0.98 | 0.71 | 0.54 | 0.49 |
| PC_ae_C44:6 | 0.87 | 0.44 | 0.84 | 0.14 | 0.76 | 0.77 | 0.98 | 0.57 | 0.07 | 0.61 | 0.55 | 0.03 | 0.37 |

C0 Carnitine; C12 Decanoylcarnitine; C12:1 Decenoylcarnitine; C14 Tetradecanoylcarnitine; C14:1 Tetradecenoylcarnitine; C16 Hexadecanoylcarnitine; C18 Octadecanoylcarnitine; C18:1 Octadecenoylcarnitine; C18:2 Octadecadienylcarnitine; C2 Acetylcarnitine; C3 Propionylcarnitine; C4 Butyrylcarnitine; C5 Valerylcarnitine

ADMA Asymmetric dimethylarginine

SDMA Symmetric dimethylarginine

T4\_OH\_Pro Trans-4-Hydroxyproline

LysoPC\_a Lyso-phosphatidylcholines

PC\_aa Phosphatidylcholines di-alkyl

PC\_ae Phosphatidylcholines alkyl-acyl

**Table S3.** Metabolites with significantly different mean concentrations by age categories in the PRÄVENT cohort (N=108).

| <b>Metabolite class</b>         | <b>Metabolite</b> | <b>p-value*</b> |
|---------------------------------|-------------------|-----------------|
| Acylcarnitines                  | C3                | 0.004500        |
|                                 | C12:1             | 0.003000        |
|                                 | C14               | 0.009375        |
| Amino Acids and Biogenic Amines | Alanine           | 0.009750        |
|                                 | Citrulline        | 0.000750        |
|                                 | Creatinine        | 0.002250        |
|                                 | Glutamate         | 0.010125        |
|                                 | Kynurenine        | 0.000375        |
|                                 | Phenylalanine     | 0.006375        |
|                                 | Proline           | 0.007500        |
|                                 | Sarcosine         | 0.008250        |
|                                 | SDMA              | 0.003375        |
|                                 | Tyrosine          | 0.001500        |
| Sphingolipids                   | SM_OH_C14:1       | 0.004875        |
|                                 | SM_OH_C16:1       | 0.005625        |
|                                 | SM_OH_C22:1       | 0.006000        |
|                                 | SM_OH_C22:2       | 0.010875        |
|                                 | SM_OH_C24:1       | 0.001125        |
|                                 | SM_C16:0          | 0.007875        |
|                                 | SM_C16:1          | 0.005250        |
|                                 | SM_C26:1          | 0.001875        |
| Glycerophospholipids            | PC_aa_C28:1       | 0.004125        |
|                                 | PC_ae_C30:2       | 0.003750        |
|                                 | PC_aa_C36:5       | 0.006750        |
|                                 | PC_aa_C36:6       | 0.010500        |
|                                 | PC_aa_C38:5       | 0.007125        |
|                                 | PC_ae_C40:2       | 0.009000        |
|                                 | PC_aa_C40:3       | 0.008625        |
|                                 | PC_aa_C40:6       | 0.002625        |

\*FDR adjusted

C3 Propionylcarnitine; C12:1 Decenoylcarnitine; C14 Tetradecanoylcarnitine

SDMA Symmetric dimethylarginine

PC\_aa Phosphatidylcholines di-alkyl

**Table S4.** Specific metabolites with significant differences in mean metabolite concentrations by sex categories in the PRÄVENT cohort (N=108).

| <b>Metabolite class</b>         | <b>Metabolite</b> | <b>p-value*</b> |
|---------------------------------|-------------------|-----------------|
| Acylcarnitines                  | C4                | 0.0071250       |
|                                 | C16               | 0.0033750       |
|                                 | C18               | 0.0063750       |
| Amino Acids and Biogenic Amines | Creatinine        | 0.0003750       |
|                                 | Glutamine         | 0.0011250       |
|                                 | Sarcosine         | 0.0056250       |
|                                 | SDMA              | 0.0030000       |
|                                 | Serine            | 0.0041250       |
|                                 | Valine            | 0.0045000       |
|                                 | Sphingolipids     | SM_OH_C22:2     |
| SM_C16:1                        |                   | 0.0026250       |
| SM_C18:1                        |                   | 0.0022500       |
| Glycerophospholipids            | PC_ae_C32:1       | 0.0052500       |
|                                 | PC_ae_C32:2       | 0.0007500       |
|                                 | PC_ae_C34:3       | 0.0060000       |
|                                 | PC_ae_C40:3       | 0.0015000       |
|                                 | PC_ae_C42:3       | 0.0048750       |
|                                 | PC_ae_C42:4       | 0.0037500       |
|                                 | PC_ae_C42:5       | 0.0067500       |

\*FDR adjusted

C4 Butyrylcarnitine; C16 Hexadecanoylcarnitine; C18 Octadecanoylcarnitine

SDMA Symmetric dimethylarginine

PC\_ae Phosphatidylcholines alkyl-acyl
